# Supplementary material
Source: PubMed Central journal article supplement (PMC3204832)
Supplement: JCI46187sd.pdf [file JCI46187sd.pdf]

## **SUPPLEMENTARY METHODS AND MATERIALS**

### **Mice and Reagents**

NOD.BDC2.5 TCR transgenic mice were obtained from the JDRF Center for Immunological Tolerance at Harvard Medical School, and bred and distributed by Jackson Laboratories. NOD.IFN- $\gamma$ <sup>-/-</sup> mice were from Jackson Laboratories and crossed with NOD.BDC2.5 TCR Tg. BDC2.5 mimetope, p79 (AVRPLWVRME) (1) was synthesized by SynBioSci. Anti-IL2 mAb (clone S4B6) was purchased from BD Biosciences.

### **Transfer of Diabetes**

Naïve T cells were activated with BDC2.5 TCR mimetope under either Th1 (10 ng/ml IL-12 plus 10  $\mu$ g/ml anti-IL-4 (clone 11B11)) or Th17 (3 ng/ml TGF- $\beta$  and 30 ng/ml IL-6 with or without 20  $\mu$ g/ml anti-IFN- $\gamma$  (clone XMG1.2)) polarizing conditions in the presence of irradiated CD4-depleted splenocytes as APCs. Polarized Th1 and Th17 cells were expanded in IL-2- and IL-23-containing medium, respectively. When the cells stopped blasting, Th1 and Th17 cells were restimulated with 1  $\mu$ g/ml each of plate-bound anti-CD3 and anti-CD28 in the presence of IL-12 plus anti-IL4 and IL-23 plus anti-IFN- $\gamma$ , respectively, for 2 d before transfer. Cells were then washed and resuspended in PBS. Between  $3 - 5 \times 10^6$  Th cells in 200  $\mu$ l were transferred i.v. into 4 – 7 wk old recipient mice. Mice were monitored daily after adoptive transfer using diastix (Bayer) and urine glucose readings greater than 250 mg/dl, mice were considered diabetic. Blood glucose was measured using an Ascensia ELITE glucometer (Bayer) to confirm hyperglycemia. Statistical analysis using Logrank tests were performed using GraphPad Prism.

## SUPPLEMENTARY FIGURES

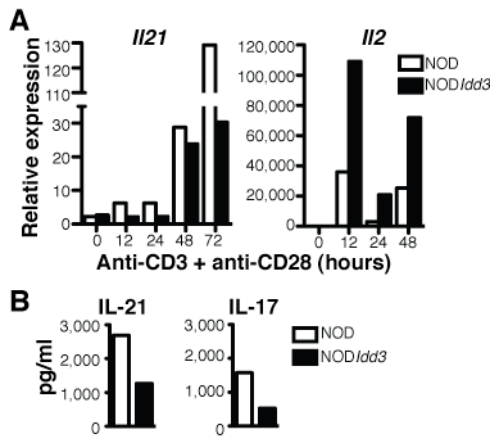

**Figure S1. Naïve T cells from NOD mice express more IL-21 and less IL-2 than naïve T cells from NOD.Idd3 mice.** Naïve T cells were stimulated with plate-bound anti-CD3 and soluble anti-CD28 (**A**) or soluble anti-CD3 in the presence of autologous APCs (**B**). IL-2 and IL-21 transcript expression was determined by real-time Taqman PCR and normalized to  $\beta$ -actin expression (**A**). Supernatants were assessed for cytokine production after 48 h in culture (**B**). Data are each representative of 3 experiments

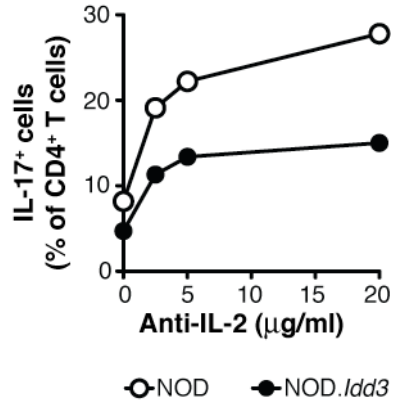

**Figure S2. Neutralization of IL-2 in Th17 cell polarizations.** Naïve T cells were cultured with plate-bound anti-CD3 and soluble anti-CD28 in the presence of IL-6, TGF- $\beta$  and anti-IL-2 antibody. Th17 polarizations were assessed after 3 d by intracellular staining after restimulation with PMA and ionomycin. The graphs show frequency of IL-17<sup>+</sup> CD4<sup>+</sup>7AAD<sup>-</sup> cells.

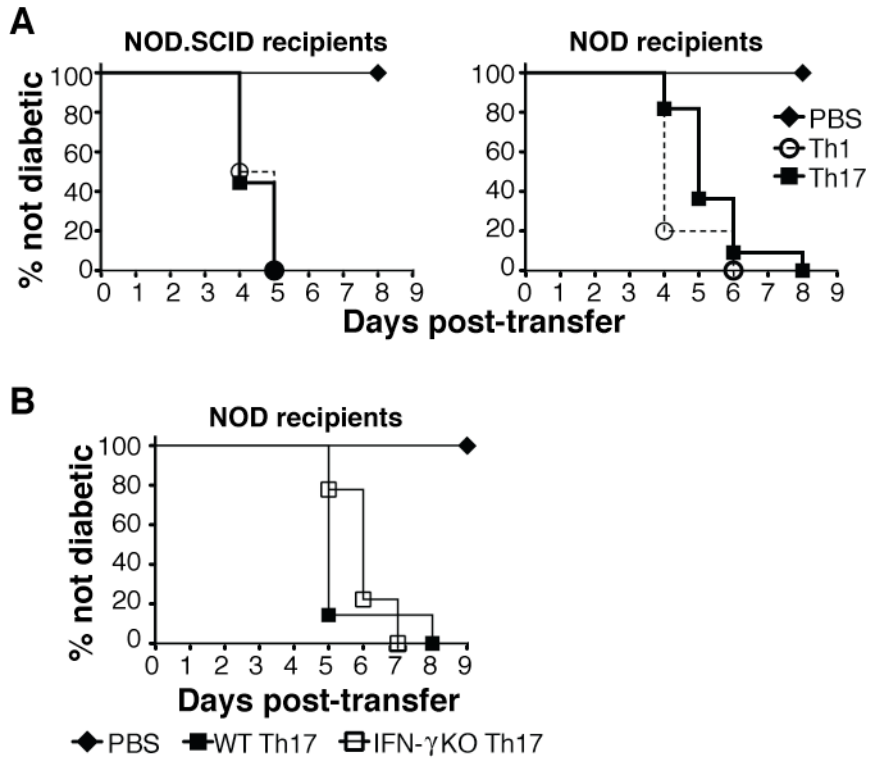

**Figure S3. Islet-specific Th17 cells can transfer diabetes as well as Th1 cells.** Th17 and Th1 cells polarized from naïve BDC2.5 TCR transgenic T cells and adoptively transferred into NOD.SCID or non-irradiated NOD mice and diabetes incidence was monitored daily (**A**). Data are pooled from 2 to 3 independent experiments. Islet-specific Th17 cells generated from T cells from IFN- $\gamma^{+/+}$  or IFN- $\gamma^{-/-}$  BCD2.5 TCR transgenic mice were transferred into NOD recipients and diabetes incidence was monitored daily (**B**). Data are pooled from 3 independent experiments. Logrank tests were performed using GraphPad Prism.

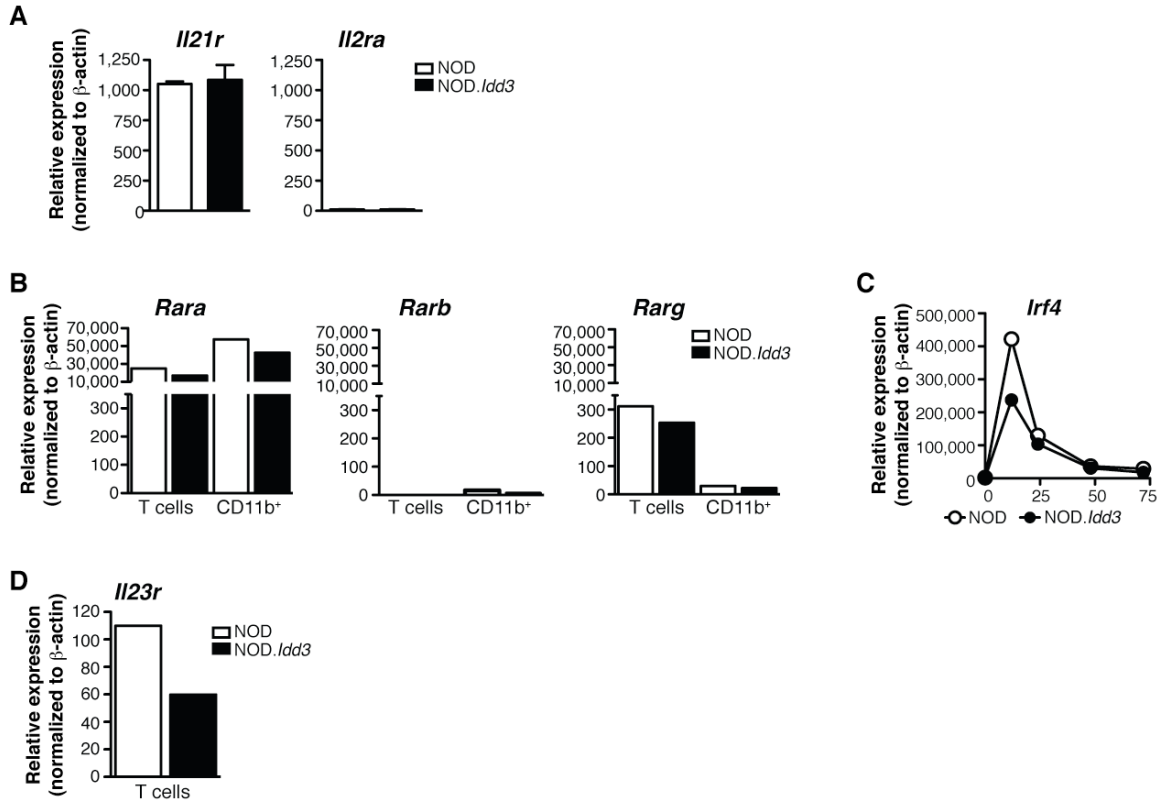

**Figure S4. Real-time PCR analyses of cells from NOD and NOD.*Idd3* mice.** Gene expression was analyzed by real-time PCR for CD11c<sup>-</sup>CD11b<sup>+</sup> cells (**A** and **B**), and CD4<sup>+</sup>Foxp3/GFP<sup>-</sup> T cells (**B** - **D**) from NOD and NOD.*Idd3* mice isolated *ex vivo* (**B** and **D**) or activated with plate-bound anti-CD3 and soluble anti-CD28 (**C**). Target gene expression was normalized to  $\beta$ -actin expression.

## REFERENCES

1. Judkowski V, *et al.* (2001) Identification of MHC class II-restricted peptide ligands, including a glutamic acid decarboxylase 65 sequence, that stimulate diabetogenic T cells from transgenic BDC2.5 nonobese diabetic mice. *J Immunol* 166(2):908-917.
